# Supplementary material
Source: publisher figshare collection journal article supplement (https://acs.figshare.com/ndownloader/files/4662736)
Supplement: Supplementary file 1 [file 4662736]

# Supporting information:

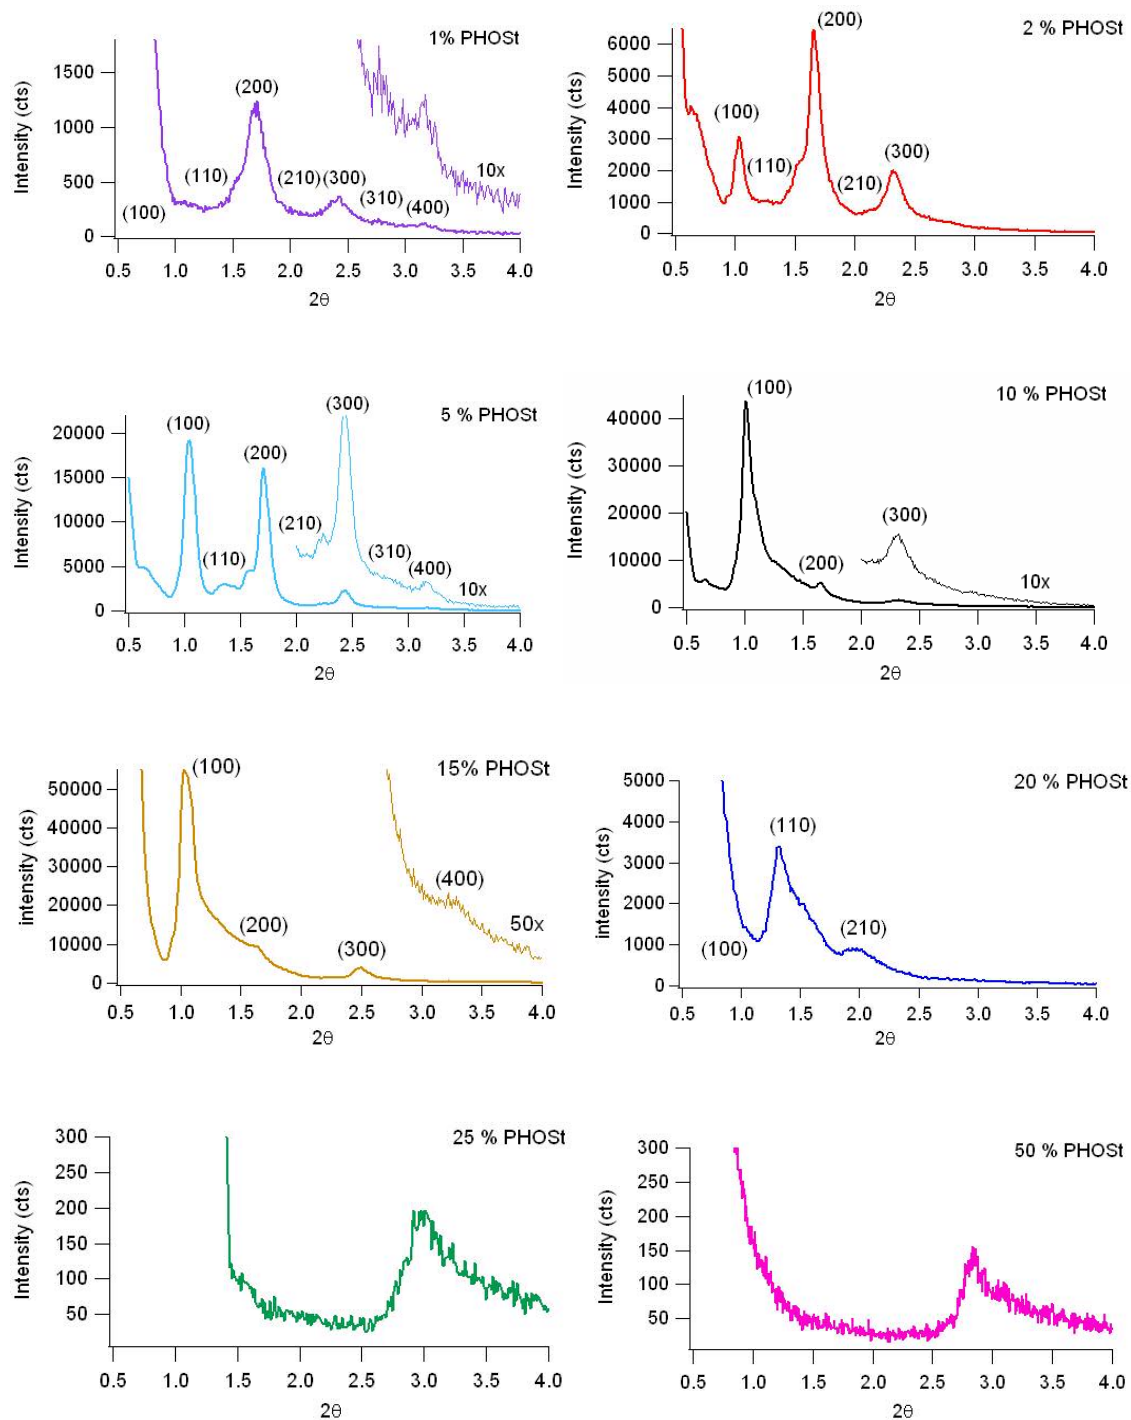

Figure S1. Individual X-ray diffraction profiles for calcined silica films as a function template composition. The reflection planes are identified for each profile where appropriate. For film FP1, FP2, and FP5, all the allowed planes for hexagonal  $P6mm$  are shown. For film FP10 and FP15, only (100), (200), (300)...are shown indicating significant orientation of the mesopores.
